# Supplementary material for: Current Development of siRNA Bioconjugates: From Research to the Clinic
Source: PubMed Central journal article supplement (PMC6498891; doi:10.3389/fphar.2019.00444), 2019-04-26
Supplement: Table_1.pdf [file Table_1.pdf]

1 **Table 1. Bioconjugates.**

| Conjugate                                                                                                 | Structure and modifications <sup>1), 2), 3), 4)</sup>                                                                                                                                                                                                                                                                                                                                                  | Target cells/organ and gene                  | Concentration or dose              | Silencing                           | Ref.                     |
|-----------------------------------------------------------------------------------------------------------|--------------------------------------------------------------------------------------------------------------------------------------------------------------------------------------------------------------------------------------------------------------------------------------------------------------------------------------------------------------------------------------------------------|----------------------------------------------|------------------------------------|-------------------------------------|--------------------------|
| <b>Lipophilic siRNA</b>                                                                                   |                                                                                                                                                                                                                                                                                                                                                                                                        |                                              |                                    |                                     |                          |
| <p>Cholesterol-siRNA</p> 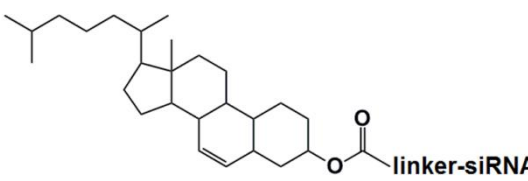 |  <p>2'-O-Me and PS modifications, aminocaproic acid-pyrrolidine linker at 3' end of S</p> <p>siRNA-O-CH<sub>2</sub>-CH<sub>2</sub>-CH<sub>2</sub>-CH<sub>2</sub>-CH<sub>2</sub>-CH<sub>2</sub>-N(OH)-C(=O)-CH<sub>2</sub>-CH<sub>2</sub>-CH<sub>2</sub>-CH<sub>2</sub>-CH<sub>2</sub>-CH<sub>2</sub>-N(H)-Ligand</p> | Mouse liver (1) and jejunum (2), <i>ApoB</i> | 50 mg/kg, 3 i.v. injections        | 57% (1), 42% (2), mRNA (after 24 h) | (Soutschek et al., 2004) |
|                                                                                                           | as in (Soutschek et al., 2004)                                                                                                                                                                                                                                                                                                                                                                         | Mouse liver (1), <i>ApoB</i>                 | 50 mg/kg, i.v.                     | 50 % mRNA, (after 48 h)             | (Wolfrum et al., 2007)   |
|                                                                                                           |  <p>Inverted thymidines, disulfide linker at the 5' end of S</p> <p>-(CH<sub>2</sub>)<sub>6</sub>-S-S-(CH<sub>2</sub>)<sub>6</sub>-</p>                                                                                                                                                                             | Mouse lungs, <i>p38</i>                      | 7.5 mg/kg, intratracheal injection | 40 % mRNA, (after 12 h)             | (Moschos et al., 2007)   |
|                                                                                                           | No modifications, aminohexyl linker from 5' end of S                                                                                                                                                                                                                                                                                                                                                   | Huh-7 cells, <i>β-Gal</i>                    | 50 nM                              | 55 % mRNA                           | (Lorenz et al., 2004)    |
|                                                                                                           | 11 2'-O-Me modifications, no pattern data, aminohexyl linker at 5' end of S                                                                                                                                                                                                                                                                                                                            | MCF7 cells, <i>IRS1</i>                      | 200 nM                             | 50 % protein                        | (Cesarone et al., 2007)  |
|                                                                                                           |                                                                                                                                                                                                                                                                                                                    | Xenograft KB-8-5                             | 10 mg/kg, i.v.                     | 60 % protein,                       | (Chernikov               |

## Current development of siRNA bioconjugates

|                                                                                                                                                                                              |                                                                            |                                                                           |                                                                            |                                        |
|----------------------------------------------------------------------------------------------------------------------------------------------------------------------------------------------|----------------------------------------------------------------------------|---------------------------------------------------------------------------|----------------------------------------------------------------------------|----------------------------------------|
| <p>2'-O-Me modifications, aminohexyl linker at 5' end of S</p>                                                                                                                               | <p>tumor in SCID mice,<br/><i>MDR1</i></p>                                 |                                                                           | <p>(after 6 days)</p>                                                      | <p>et al.,<br/>2017)</p>               |
| <p>2'-O-Me modifications, linker at 3' end of S</p> 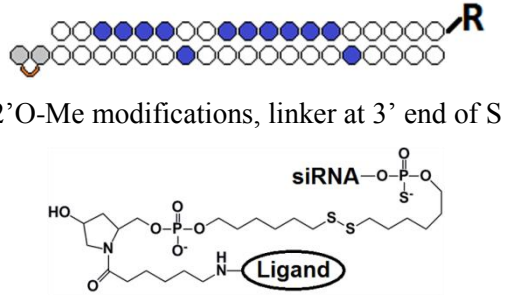                                                       | <p>Rat spinal cord, <i>CNS</i></p>                                         | <p>~4 mg/kg<br/>(injection<br/>10 µl/h, during 3<br/>days)</p>            | <p>60% mRNA<br/>(after 24 h)</p>                                           | <p>(Chen et<br/>al., 2010)</p>         |
| <p>2'-O-Me, 2'-F and PS modifications,<br/>tetraethyleneglycol (TEG) linker at 3' end of S</p>             | <p>Rat eye, <i>Ppib</i></p>                                                | <p>0.15 mg/kg,<br/>intraocular<br/>injection</p>                          | <p>55% mRNA<br/>(after 2 days)</p>                                         | <p>(Byrne et<br/>al., 2013)</p>        |
| <p>2'-O-Me, 2'-F and PS modifications, TEG linker at 3' end of<br/>S</p>                                  | <p>Mouse brain: striatum<br/>(1) and<br/>cortex (2), <i>Htt</i></p>        | <p>~1.25 mg/kg,<br/>intracranial<br/>injection (i.c.) to<br/>striatum</p> | <p>75 % (1),<br/>40 % (2)<br/>protein<br/>(after 5 days)</p>               | <p>(Alterman<br/>et al.,<br/>2015)</p> |
| <p>2'-O-Me, 2'-F, PS and 5'-(<i>E</i>)-vinylphosphonate modifications,<br/>C7 linker at 3' end of S</p>  | <p>Mouse liver (1) and<br/>kidneys (2), <i>Htt</i> and<br/><i>Ppib</i></p> | <p>20 mg/kg,<br/>subcutaneous<br/>injection (s.c.)</p>                    | <p>50 and 70 %<br/>(1), ~5 and<br/>30% (2)<br/>mRNA<br/>(after 7 days)</p> | <p>(Biscans et<br/>al., 2018)</p>      |

## Current development of siRNA bioconjugates

|                                                                                              |                                                                                                                                                                          |                                                     |                                            |                                |                         |
|----------------------------------------------------------------------------------------------|--------------------------------------------------------------------------------------------------------------------------------------------------------------------------|-----------------------------------------------------|--------------------------------------------|--------------------------------|-------------------------|
|                                                                                              | 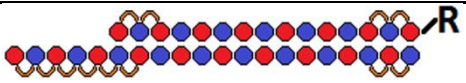 <p>2'O-Me, 2'F and PS modifications, TEG linker at 3' end of S</p>                    | Placenta of pregnant CD1 mice, <i>sFLT1</i>         | 20 mg/kg, i.v.                             | 25 % mRNA (after 5 days)       | (Turanov et al., 2018)  |
|                                                                                              |  <p>2'O-Me and PS modifications, aminohexyl linker at 5' end of S</p>                  | Liver of ICR mice, <i>Factor VII (F7)</i>           | 5 mg/kg, i.v.                              | 0% protein (after 2 days)      | (Wong et al., 2012)     |
|                                                                                              |  <p>2'O-Me, 2'F, dNMP, PS and inverted thymidine, aminohexyl linker at 5' end of S</p> | Liver of ICR mice, <i>Factor VII (F7)</i>           | 10 mg/kg, i.v.                             | 20 % protein, (after 2 days)   | (Wooddell et al., 2013) |
| Cholesterol-siRNA and polyconjugate (N-acetylgalactosamine-PBAVE)                            |  <p>2'O-Me and PS modifications, aminohexyl linker at 5' end of S</p>                 | Rhesus monkey liver, <i>ApoB</i>                    | 2 mg/kg siRNA and 15 mg/kg NAG-PBAVE, i.v. | 75% protein (during 30 days)   | (Wong et al., 2012)     |
| Cholesterol-siRNA and conjugate of N-acetylgalactosamine and melittin-like peptide (NAG-MLP) |  <p>2'O-Me, 2'F, dNMP, PS and inverted thymidine,</p>                                | Liver of cynomolgus monkeys, <i>Factor VII (F7)</i> | 2 mg/kg siRNA and 3 mg/kg NAG-MLP, i.v.    | 99 % protein, (during 25 days) | (Wooddell et al., 2013) |

## Current development of siRNA bioconjugates

|                                                                                                                                                                                      |                                                                                                                                                                                                                                                                                                     |                                                         |                                             |                                                             |                         |
|--------------------------------------------------------------------------------------------------------------------------------------------------------------------------------------|-----------------------------------------------------------------------------------------------------------------------------------------------------------------------------------------------------------------------------------------------------------------------------------------------------|---------------------------------------------------------|---------------------------------------------|-------------------------------------------------------------|-------------------------|
|                                                                                                                                                                                      | <p style="text-align: center;">aminohexyl linker at 5' end of S</p> 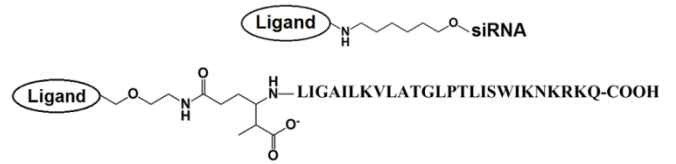                                                                                                                                              | Human liver, HBV infection, <i>HBx</i> , <i>preC-C</i>  | 4 mg/kg mix of siRNA and NAG-MLP, i.v.      | ~90 % HBsAg (Hepatitis B surface Antigen), (during 50 days) | (Wooddell et al., 2017) |
| <p style="text-align: center;">Docosanyl-siRNA (C22)</p>                                             | <p style="text-align: center;">as in (Soutschek et al., 2004)</p>                                                                                                                                                                                                                                   | Mouse liver, <i>ApoB</i>                                | 50 mg/kg, 3 i.v. injections                 | 50 % mRNA (after 24 h)                                      | (Wolfrum et al., 2007)  |
| <p style="text-align: center;">Stearoyl-siRNA (C18)</p>                                              |                                                                                                                                                                                                                                                                                                     |                                                         |                                             | 30 % mRNA (after 24 h)                                      |                         |
| <p style="text-align: center;">Lithocholic-oleyl-siRNA</p>                                           |                                                                                                                                                                                                                                                                                                     |                                                         |                                             | 35 % mRNA (after 24 h)                                      |                         |
| <p style="text-align: center;">Palmitoyl-ssPHK (C16)</p>                                           |  <p style="text-align: center;">2'-O-Me, 2'-O-MOE, 2'-F, PS and 5'-(E)- vinylphosphonate modifications single stranded siRNA, aminohexyl linker is attached at 5' end of S through 2' position of the ribose</p> | Liver of transgenic mouse, <i>ApoC III</i> (Human gene) | 14 mg/kg, s.c. (IC <sub>50</sub> ~10 mg/kg) | 65% mRNA, (after 2 days)                                    | (Prakash et al., 2015)  |
| <p style="text-align: center;"><math>\alpha</math>-Tocopherol- Dicer-substrate siRNA (DisRNA)</p>  |  <p style="text-align: center;">2'-O-Me and PS modifications, <math>\alpha</math>-tocopherol is attached at 5' end of AS through 5'</p>                                                                         | Mouse liver, <i>ApoB</i>                                | 32 mg/kg, i.v.                              | 80 % mRNA, (after 2 days) (IC <sub>50</sub> ~2 mg/kg)       | (Nishina et al., 2008)  |

|                                              | phosphate <sup>3)</sup>                                                                                                                                                                                                                                                                               |                                                                |                                                           |                                                           |                            |
|----------------------------------------------|-------------------------------------------------------------------------------------------------------------------------------------------------------------------------------------------------------------------------------------------------------------------------------------------------------|----------------------------------------------------------------|-----------------------------------------------------------|-----------------------------------------------------------|----------------------------|
| <b>Conjugates of siRNA and peptides</b>      |                                                                                                                                                                                                                                                                                                       |                                                                |                                                           |                                                           |                            |
| SPACE-siRNA<br>«ACKTGSHNQCG»-siRNA           | All nucleotides are 2'O-Me modified (1),<br>or without modifications (2), amide linker at 3' end of AS                                                                                                                                                                                                | Mouse epidermis, <i>IL10</i>                                   | Application to the skin, 3 cm <sup>2</sup> ,<br>~12 mg/kg | 23 % (1),<br>28% (2),<br>protein,<br>(after 24 h)         | (Hsu and Mitragotri, 2011) |
| cRGD-siRNA<br>«RGDFK»-siRNA (cyclic peptide) | 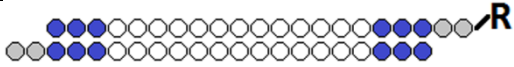<br>2'O-Me <u>and</u> dNMP modifications, linker at 3' end of AS<br>                                                              | Xenograft A549 tumor<br>in BALB/c nude<br>mouse, <i>VEGFR2</i> | 0.752 mg/kg,<br>6 i.v. injections<br>every 3 days         | 55% mRNA,<br>60% protein,<br>reduced tumor<br>growth rate | (Liu et al., 2014)         |
| TAT-siRNA<br>«YGRKKRRQRRR»-siRNA             | No modifications, linker at 3' end of AS<br>-N-end-Cys-HN-(CH <sub>2</sub> ) <sub>3</sub> -                                                                                                                                                                                                           | HeLa cells, <i>GFP</i>                                         | 400 nM                                                    | 60 %<br>protein                                           | (Chiu et al., 2004)        |
|                                              | Inverted thymidines, linker at 3' end of AS<br>-C-end-Cys-S-(CH <sub>2</sub> ) <sub>6</sub> -                                                                                                                                                                                                         | Mouse lungs,<br><i>MAPK14</i>                                  | 7.5 mg/kg,<br>intratracheal                               | 40 % mRNA<br>(after 12 h)                                 | (Moschos et al., 2007)     |
| TAT-siRNN (neutral ribonucleic acid)         | <br>2'O-Me purines, 2'F pyrimidines, dNMP and <i>t</i> Bu-SATE<br>modifications, linkers are at phosphates of both strands<br> | H1299-dGFP cells,<br><i>GFP</i>                                | 50 nM                                                     | 85 % protein                                              | (Meade et al., 2014)       |
| Penetratin-siRNA                             | No modifications, linker at 5' end of S                                                                                                                                                                                                                                                               | C166-GFP (1),                                                  | 25 nM                                                     | 80 % (1),                                                 | (Muratovs                  |

## Current development of siRNA bioconjugates

|                                                                   |                                                                                                                                                                                                                                                        |                                                    |                            |                              |                                         |
|-------------------------------------------------------------------|--------------------------------------------------------------------------------------------------------------------------------------------------------------------------------------------------------------------------------------------------------|----------------------------------------------------|----------------------------|------------------------------|-----------------------------------------|
| «CRQIKIWFQNRRMKWKK»-siRNA                                         | -N-end-Cys-S-                                                                                                                                                                                                                                          | EOMA-GFP (2) cells,<br><i>GFP</i>                  |                            | 95 % (2)<br>protein          | ka and<br>Eccles,<br>2004)              |
|                                                                   | Inverted thymidines, linker at 5' end of S<br>-C-end-Cys -S-(CH <sub>2</sub> ) <sub>6</sub> -                                                                                                                                                          | Lungs of mouse,<br><i>MAPK14</i>                   | 7.5 mg/kg<br>intratracheal | 20 % mRNA<br>(after 12 h)    | (Moschos<br>et al.,<br>2007)            |
| Transportan-siRNA<br>«CLIKKALAALAKLNIKLLYGASNLWG»- siRNA          | No modifications, linker at 5' end of S<br>-N-end-Cys-S-                                                                                                                                                                                               | COS-7 cells,<br><i>F. luciferase</i>               | 25 nM                      | 50 % protein                 | (Muratovs<br>ka and<br>Eccles,<br>2004) |
|                                                                   |                                                                                                                                                                                                                                                        | C166-GFP (1),<br>EOMA-GFP (2) cells,<br><i>GFP</i> | 25 nM                      | 68 % (1) 97 %<br>(2) protein |                                         |
| «Peptide that is cleaved by caspase 4»-<br>siRNA<br>«LEVDG»-siRNA | No modifications, aminohexyl linker at 5' end of AS                                                                                                                                                                                                    | Jed-3 cells,<br><i>STAT3</i>                       | 200 nM                     | 70 % protein                 | (Koehn et<br>al.)                       |
| «Peptide analogue of IGF1»-siRNA<br>«CSKC»-siRNA                  | 11 2'O-Me, no pattern data, aminohexyl linker at 5' end of<br>S                                                                                                                                                                                        | MCF7 cells,<br><i>IRS1</i>                         | 200 nM                     | 65 % protein                 | (Cesarone<br>et al.,<br>2007)           |
| Albumin-siRNA                                                     | 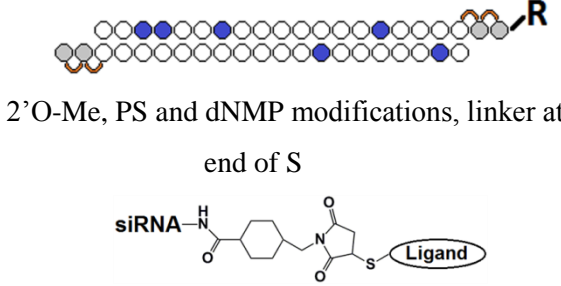 <p>2'O-Me, PS and dNMP modifications, linker at 3'<br/>end of S</p> <p>siRNA-NH-C(=O)-C<sub>6</sub>H<sub>10</sub>-N-C(=O)-C<sub>2</sub>H<sub>4</sub>-S-Ligand</p> | Heart of BALB/c<br>mouse,<br><i>IGF-IR</i>         | 5 mg/kg, i.v.              | 35 % mRNA<br>(after 3 days)  | (Lau et al.,<br>2012)                   |
| <b>N-acetylgalactosamine-conjugated siRNA</b>                     |                                                                                                                                                                                                                                                        |                                                    |                            |                              |                                         |

|                                         |                                                                                                                                                                                                                                                                                           |                                                |                                    |                                                                          |                             |
|-----------------------------------------|-------------------------------------------------------------------------------------------------------------------------------------------------------------------------------------------------------------------------------------------------------------------------------------------|------------------------------------------------|------------------------------------|--------------------------------------------------------------------------|-----------------------------|
| <p>N-acetylgalactosamine-siRNA</p>      | 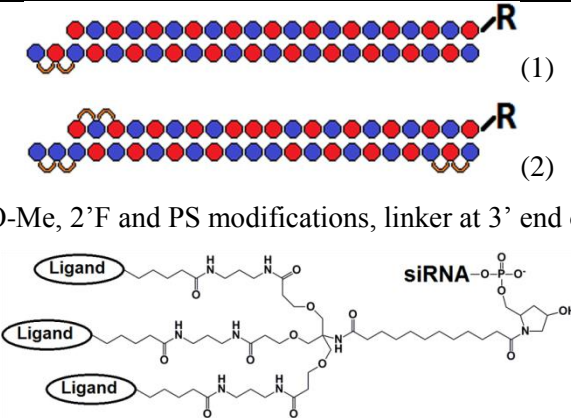 <p>(1)</p> <p>(2)</p> <p>2'-O-Me, 2'-F and PS modifications, linker at 3' end of S</p> <p>Ligand</p> <p>siRNA</p>                                                                                      | <p>Mouse liver, <i>transthyretin (TTR)</i></p> | <p>5 mg/kg, s.c.</p>               | <p>55 % (1),<br/>85% (2)<br/>mRNA (during<br/>more than 40<br/>days)</p> | <p>(Nair et al., 2014)</p>  |
|                                         |  <p>2'-O-Me, 2'-F, PS and dNMP modifications<br/>(Advanced ESC), linker as in (Nair et al., 2014) at 3' end of S</p>                                                                                    | <p>Human liver, <i>PCSK9</i></p>               | <p>~6 mg/kg<br/>(500 mg), s.c.</p> | <p>70 % protein<br/>(during<br/>6 months)</p>                            | <p>(Ray et al., 2017)</p>   |
| <p>N-acetylgalactosamine-siRNN</p>      |  <p>2'-O-Me, 2'-F, <i>t</i>Bu-SATE, DMB, PS and dNMP modifications, linker attached to the internucleotide phosphate at 5' end of S</p> <p>tBu-SATE</p> <p>tBu-SATE PS</p> <p>DMB PS</p> <p>Ligand</p> | <p>Mouse liver, <i>ApoB</i></p>                | <p>25 mg/kg, i.v.</p>              | <p>60 % mRNA<br/>(during 12<br/>days)</p>                                | <p>(Meade et al., 2014)</p> |
| <p>Conjugates of siRNA and aptamers</p> |                                                                                                                                                                                                                                                                                           |                                                |                                    |                                                                          |                             |

## Current development of siRNA bioconjugates

|                                                                                             |                                                                                                                                                                                                                               |                                                                                                  |                                                                                          |                                                                                                       |                          |
|---------------------------------------------------------------------------------------------|-------------------------------------------------------------------------------------------------------------------------------------------------------------------------------------------------------------------------------|--------------------------------------------------------------------------------------------------|------------------------------------------------------------------------------------------|-------------------------------------------------------------------------------------------------------|--------------------------|
| «RNA aptamer (A10) to PSMA»-siRNA                                                           | No modifications,<br>Aptamer is attached through adenine at 5' end of S <sup>4</sup>                                                                                                                                          | LNCaP cells, <i>PLK1</i><br><br>Xenograft LNCaP tumor in athymic mice, <i>PLK1</i>               | 400 nM<br><br>0.3 mg/kg (200 pmole), 10 intratumoral injections (i.t.) during 20 days    | 85 % mRNA<br><br>Tumor regression                                                                     | (McNamar a et al., 2006) |
| «RNA aptamer (A10-3) to PSMA»-shPHK                                                         | No modifications,<br>Aptamer is attached through the uracil at 5' end of S <sup>4</sup>                                                                                                                                       | LNCaP cells, <i>PRKDC</i><br><br>Xenograft LNCaP tumor in nude mice, <i>PRKDC</i>                | 400 nM<br><br>0.3 mg/kg (200 pmole), 2 i.t. injections, together with ionizing radiation | 85 % mRNA<br><br>65 % mRNA, tumor regression                                                          | (Ni et al., 2011)        |
| «RNA aptamer (A-1) to gp120»- DisRNA                                                        | 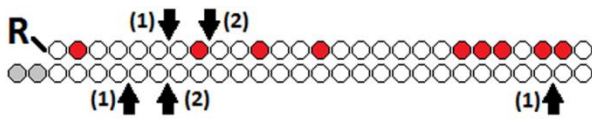 <p>2'F pyrimidines, aptamer is attached through two uracils at 5' end of S<sup>4</sup></p>                                                | HIV-1 infection in humanized Rag2 <sup>-/-</sup> γc <sup>-/-</sup> mice, <i>Tat</i> , <i>Rev</i> | 0.38 mg/kg (250 pmole), 8 i.v. injections during 4 weeks                                 | 90 % mRNA (at PBMC), reduction of HIV-1 particles in plasma by 10 <sup>5</sup> times (during 4 weeks) | (Neff et al., 2011)      |
| «RNA aptamer (Gint4.T) to beta-type platelet-derived growth factor receptor (PDGFRβ)»-siRNA |  <p>2'F modifications, linker is the duplex containing 2'O-Me and 2'F modifications and (CH<sub>2</sub>)<sub>3</sub>, complementarily</p> | Xenograft U87MG tumor in NOD/SCID nude mice, <i>STAT3</i>                                        | 2.6 mg/kg (1.6 nmole), 5 intrapetally injections (i.p.)                                  | 60 % mRNA; 77 % protein (after 3 days), tumor growth                                                  | (E sposito et al., 2018) |



## Current development of siRNA bioconjugates

|                                                    |                                                                                                                                                                                     |                                                                                    |                                                      |                                                  |                        |
|----------------------------------------------------|-------------------------------------------------------------------------------------------------------------------------------------------------------------------------------------|------------------------------------------------------------------------------------|------------------------------------------------------|--------------------------------------------------|------------------------|
|                                                    | <p style="text-align: center;">binds to 3' end of the AS</p> 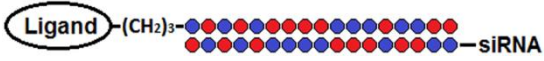                                     |                                                                                    | for 9 days                                           | retardation                                      |                        |
| «DNA aptamer (aptNCL) to nucleolin»-siRNA          | <p style="text-align: center;">The DNA aptamer has two poly-T tails attached through a sulfhydryl group to the sulfosuccinimidyl-4- (N-maleimidophenyl) butyrate at 3' end of S</p> | Xenograft CL1-5 tumor in NOD-SCID mice, <i>SLUG, NPR1</i>                          | 0.1 mg/kg (50 pmole), 15 i.t. injections for 5 weeks | 95 % protein, tumor growth retardation           | (Lai et al., 2014)     |
| <b>Conjugates of siRNA and antibodies</b>          |                                                                                                                                                                                     |                                                                                    |                                                      |                                                  |                        |
| «Ab to insulin receptor»-siRNA                     | <p style="text-align: center;">No modifications, biotin-streptavidin linker at 5' end of S</p>                                                                                      | HEK 293 cells, <i>F. luciferase</i>                                                | 115 nM                                               | 90 % protein                                     | (Xia et al., 2009)     |
| «AT (hu3S193) to Lewis-Y»-siRNA                    | <p style="text-align: center;">dNMP modifications, linker at 5' end of AS</p>                     | A431 cells, <i>STAT3</i>                                                           | 300 nM (1), 300 nM and 100 μM chloroquine (2)        | 0 % (1), 60 % (2), mRNA                          | (Ma et al., 2011)      |
| «Ab (TfRMAb) to transferrin receptor»-siRNA        | <p style="text-align: center;">No modifications, TEG biotin-streptavidin linker at 5' end of S</p>                                                                                  | Glioblastoma RG-2 cells implanted in the brain in CD344 rats, <i>F. luciferase</i> | 0.27 mg/kg, i.v.                                     | 81 % protein (after 2 days)                      | (Xia et al., 2007)     |
| «F <sub>ab</sub> fragment (RI7 217) to CD71»-siRNA | <p style="text-align: center;">2'O-Me, 2'F and PS modifications, linker at 3' end of S</p>      | Peripheral artery disease model in C57BL/6J mice, <i>MSTN</i>                      | ~3.6 mg/kg, 4 intramuscular injections for 4 weeks   | 72 % mRNA, increase the running distance by 24 % | (Sugo et al., 2016)    |
| «Ab to TENB2»-siRNA                                |                                                                                                 | Xenograft PC3-TENB2-high tumor in                                                  | 24 mg/kg, 3 i.v. injections                          | ~33% mRNA, (after 2 days)                        | (Cuellar et al., 2014) |

|                                          |                                                                                                                                                               |                                                                                                                                   |                                       |                                     |                        |
|------------------------------------------|---------------------------------------------------------------------------------------------------------------------------------------------------------------|-----------------------------------------------------------------------------------------------------------------------------------|---------------------------------------|-------------------------------------|------------------------|
|                                          | 2'O-Me and 2'F modifications, linker as in (Lau et al., 2012) at 3' end of S                                                                                  | nude mice, <i>PPIB</i>                                                                                                            |                                       |                                     |                        |
| <b>Other siRNA conjugates</b>            |                                                                                                                                                               |                                                                                                                                   |                                       |                                     |                        |
| CpG-DisRNA<br>TCCATGACGTTCTGATGCT-DisRNA | No modifications, C15 hydrocarbon linker at 5' end of AS                                                                                                      | AML model, <i>Cbfb-MYH11/Mpl<sup>+</sup></i> cells i.v. injected in <i>NOD/SCID/IL-2R<math>\gamma</math>KO</i> mice, <i>STAT3</i> | 5 mg/kg, 6 i.v. injections for 6 days | 45% mRNA, in AML cells (after 24 h) | (Hossain et al., 2014) |
| Dynamic polyconjugate                    | 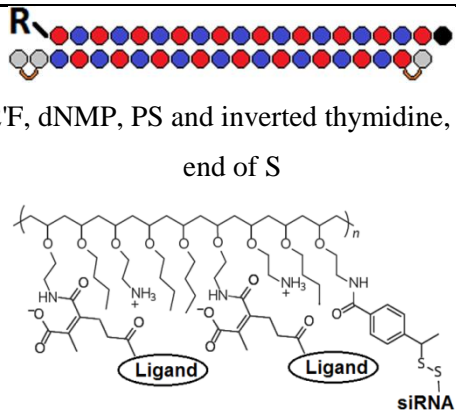 <p>2'O-Me, 2'F, dNMP, PS and inverted thymidine, linker at 5' end of S</p> | Liver of cynomolgus monkeys, <i>Factor VII (F7)</i>                                                                               | 5 mg/kg, i.v.                         | 99 % protein, (during 80 days)      | (Rozema et al., 2015)  |

- 2 1) sense strand (S) 3'-5' is above, antisense strand (AS) 3'-5' is below;
- 3 2) white color indicates unmodified RNA nucleotides; 2'O-Me is blue; 2'F is red; dNMP is grey; PS is orange; inverted thymidine is black;
- 4 2'O-MOE is violet; 5'(E)- vinylphosphonate is green;
- 5 3) "R" is a linker with ligand;
- 6 4) The estimated cleavage sites by the Dicer are indicated by arrows.
